# Supplementary material
Source: PubMed Central journal article supplement (PMC7822714)

## Supplemental Table 1 & Figures 1-6

### Table S1 - related to Table 1

**Table S1: Baseline characteristics of (iii) first-degree relatives of non-NAFLD control group and (iv) first-degree relatives of NAFLD-cirrhosis group**

| Characteristics                      | first-degree relatives of non-NAFLD control group (N = 44) (iii)<br>(s.d.) | first-degree relatives of NAFLD-cirrhosis group (N = 38) (iv)<br>(s.d.) | Wilcoxon p-value (iii↔iv) |
|--------------------------------------|----------------------------------------------------------------------------|-------------------------------------------------------------------------|---------------------------|
| <b>Demographics</b>                  |                                                                            |                                                                         |                           |
| Age (years)                          | 43.91 (20.55)                                                              | 46.82 (14.71)                                                           | n.s.                      |
| Female (n%)                          | 32 (72.7%)                                                                 | 29 (76.3%)                                                              |                           |
| White (n%)                           | 34 (77.3%)                                                                 | 11 (28.9%)                                                              |                           |
| Hispanic (n%)                        | 7 (15.9%)                                                                  | 22 (57.9%)                                                              |                           |
| BMI (kg/m <sup>2</sup> )             | 25.28 (4.46)                                                               | 35.96 (13.59)                                                           | <0.001                    |
| <b>Clinical</b>                      |                                                                            |                                                                         |                           |
| Type 2 Diabetes (n%)                 | 2 (4.55%)                                                                  | 7 (18.4%)                                                               |                           |
| <b>Biological data</b>               |                                                                            |                                                                         |                           |
| AST (U/L)                            | 25.12 (9.05)                                                               | 25.51 (10.64)                                                           | n.s.                      |
| ALT (U/L)                            | 23.26 (16.43)                                                              | 25.97 (10.54)                                                           | <0.05                     |
| Alk P (U/L)                          | 72.05 (33.36)                                                              | 74.32 (21.1)                                                            | n.s.                      |
| GGT (U/L)                            | 25.21 (25.82)                                                              | 33.81 (25.08)                                                           | <0.05                     |
| Total Bilirubin (mg/dL)              | 0.46 (0.21)                                                                | 0.52 (0.2)                                                              | n.s.                      |
| Direct Bilirubin (mg/dL)             | 0.11 (0.03)                                                                | 0.18 (0.04)                                                             | <0.001                    |
| Albumin (g/dL)                       | 4.52 (0.37)                                                                | 4.44 (0.22)                                                             | n.s.                      |
| Glucose (mg/dl)                      | 88.05 (10.51)                                                              | 95.05 (24.19)                                                           | n.s.                      |
| Hemoglobin A1c (%)                   | 5.7 (0.48)                                                                 | 5.65 (0.75)                                                             | n.s.                      |
| Insulin (U/ml)                       | 8.07 (4.89)                                                                | 22.91 (21.12)                                                           | <0.001                    |
| Triglycerides (mg/dL)                | 81.12 (44.1)                                                               | 140.47 (79.65)                                                          | <0.001                    |
| Total cholesterol (mg/dL)            | 178.45 (37.88)                                                             | 183.21 (40.52)                                                          | n.s.                      |
| HDL-cholesterol (mg/dL)              | 66.02 (21.54)                                                              | 49 (13.08)                                                              | <0.001                    |
| LDL-cholesterol (mg/dL)              | 96.29 (31.4)                                                               | 103.61 (40.29)                                                          | n.s.                      |
| Platelet count (10 <sup>3</sup> /μL) | 244.29 (52.11)                                                             | 258.32 (70.09)                                                          | n.s.                      |
| Prothrombin time                     | 11.25 (2.57)                                                               | 11.65 (4.24)                                                            | n.s.                      |
| INR                                  | 1.1 (0.33)                                                                 | 1.1 (0.39)                                                              | n.s.                      |
| Ferritin (ng/mL)                     | 86.05 (61.24)                                                              | 128.29 (126.63)                                                         | n.s.                      |
| <b>Imaging data</b>                  |                                                                            |                                                                         |                           |
| MRI-PDFF (%)                         | 2.22 (0.8)                                                                 | 7.96 (6.56)                                                             | <0.001                    |
| MRE (kPa)                            | 2.19 (0.68)                                                                | 2.63 (1.08)                                                             | <0.05                     |

# Figure S1 - related to Figure 1

**A**

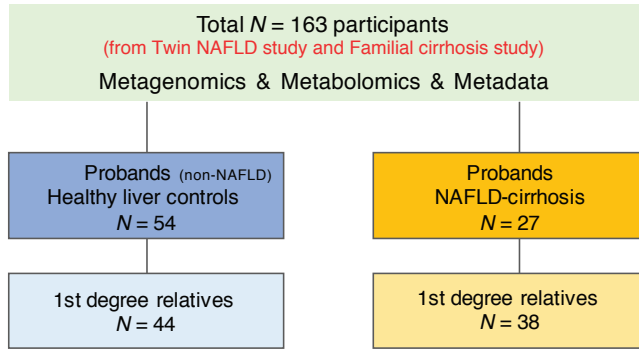

**B**

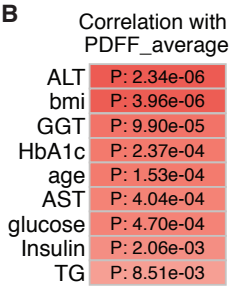

**C**

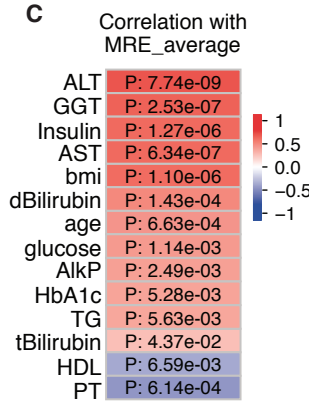

**D**

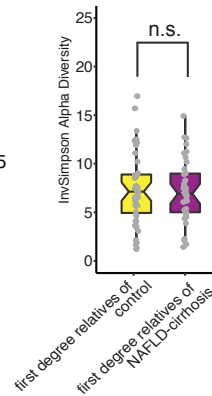

**E**

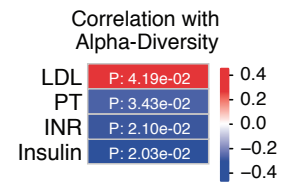

**F**

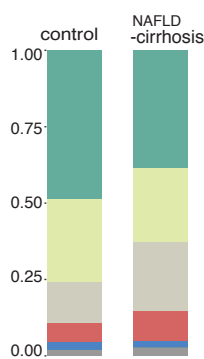

phylum-level

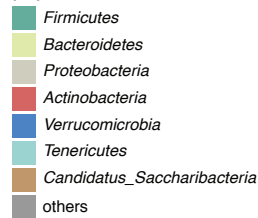

**G**

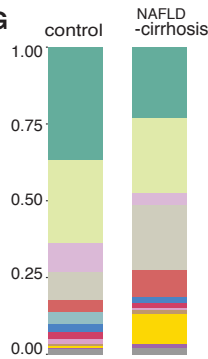

order-level

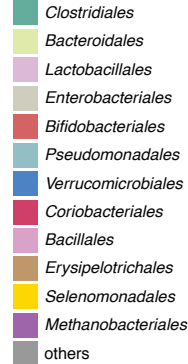

**H**

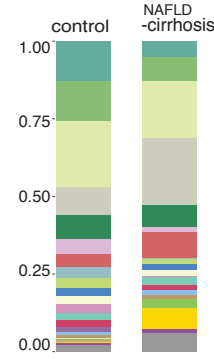

family-level

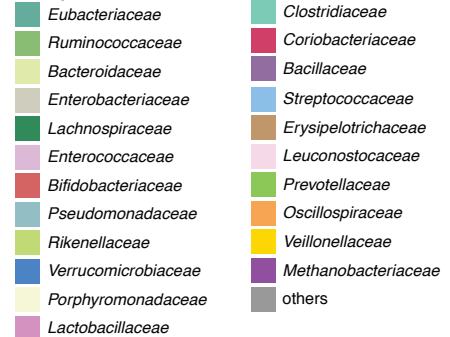

# Figure S2 - related to Figure 1

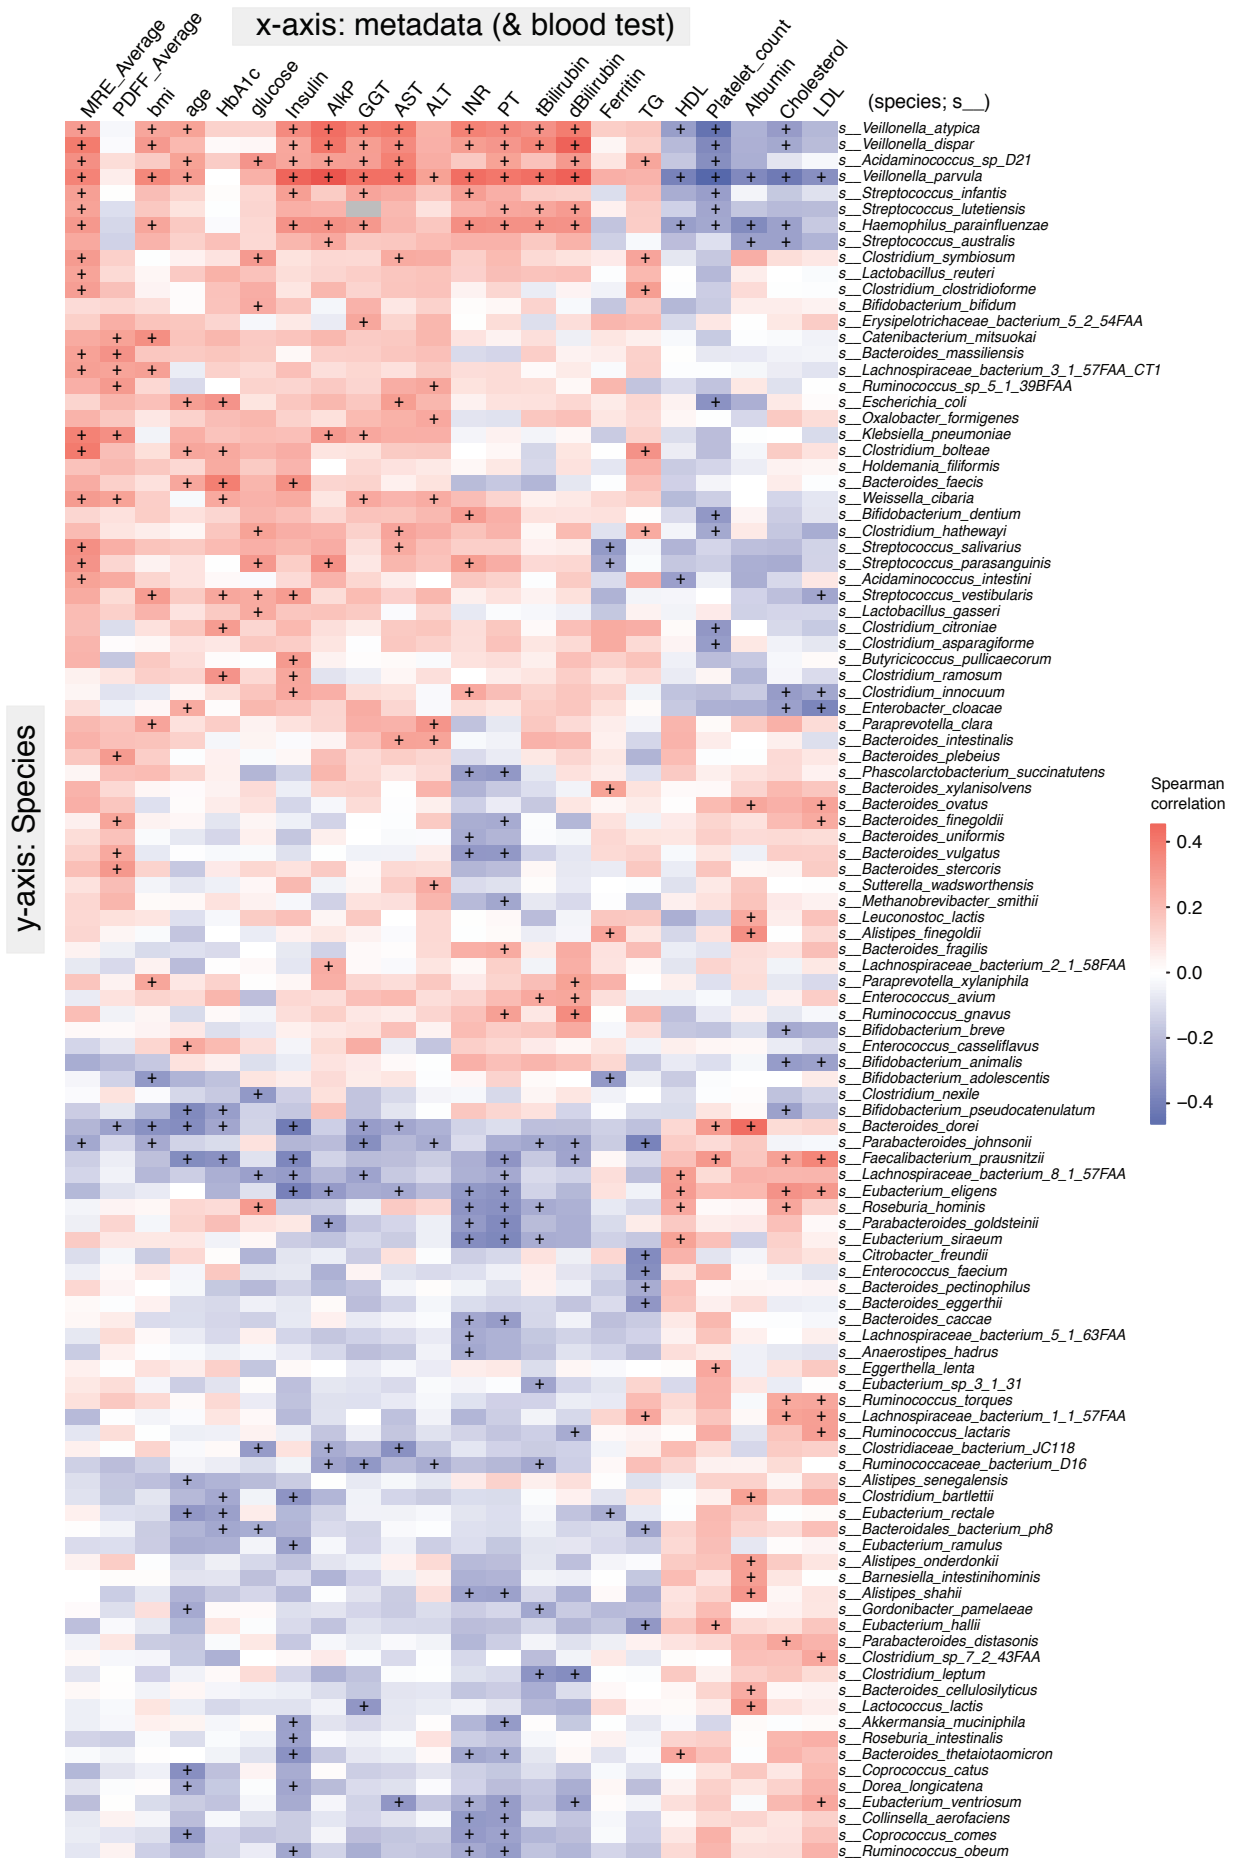

# Figure S3 - related to Figure 1

## A microbiome: discriminatory genera

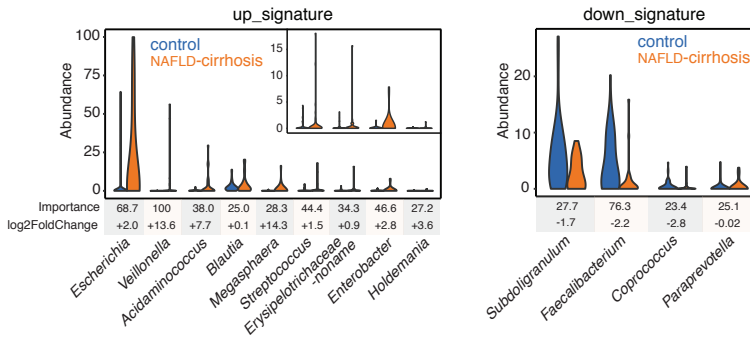

## B x-axis: metadata (& blood test)

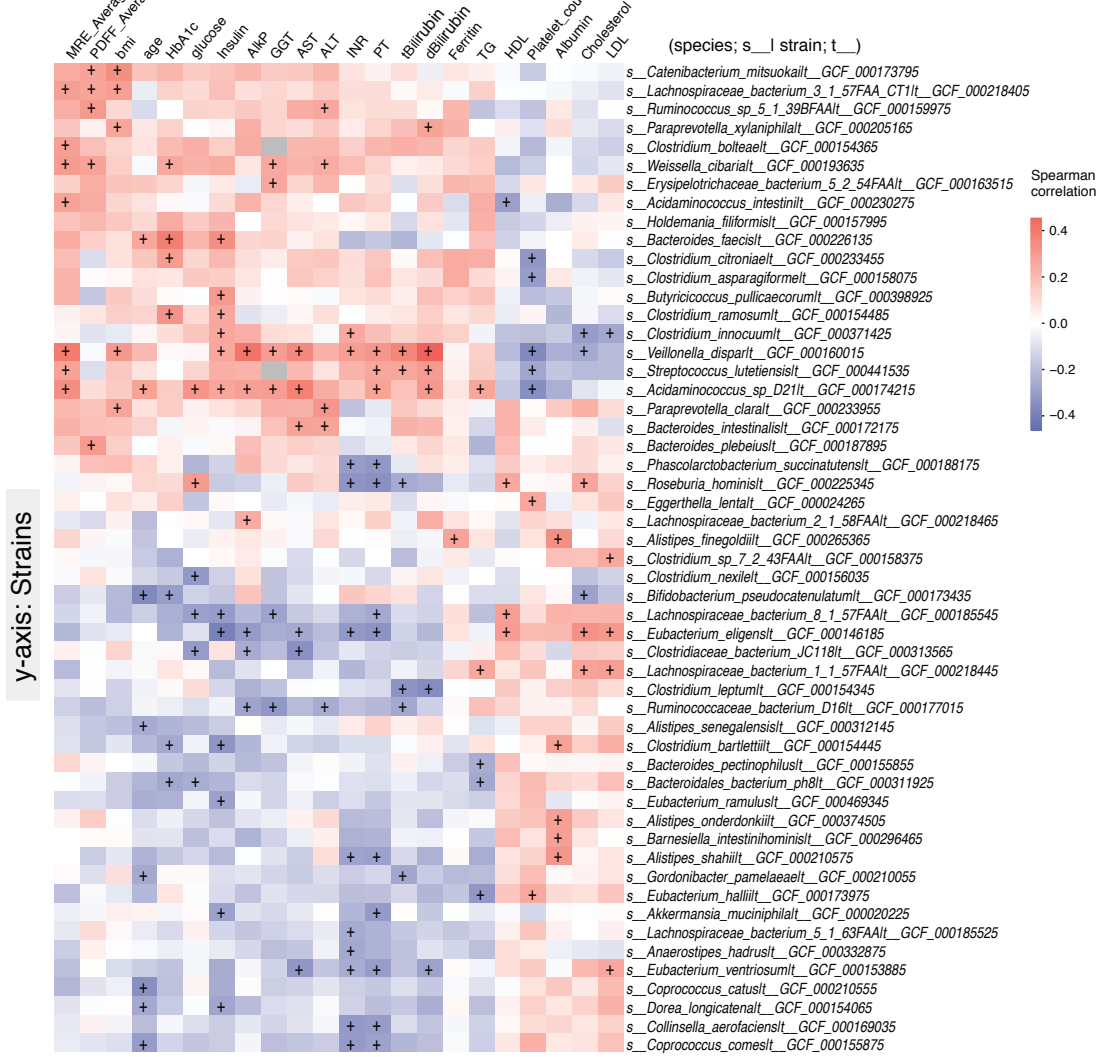

## C microbiome: discriminatory strains

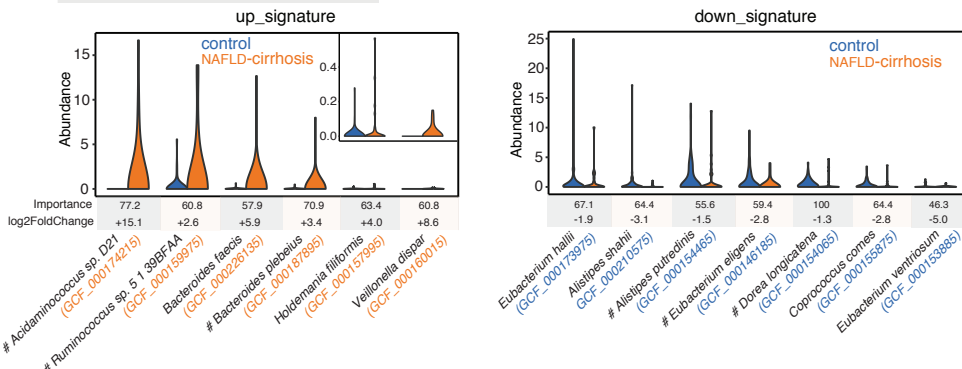

# Figure S4 - related to Figure 2

A

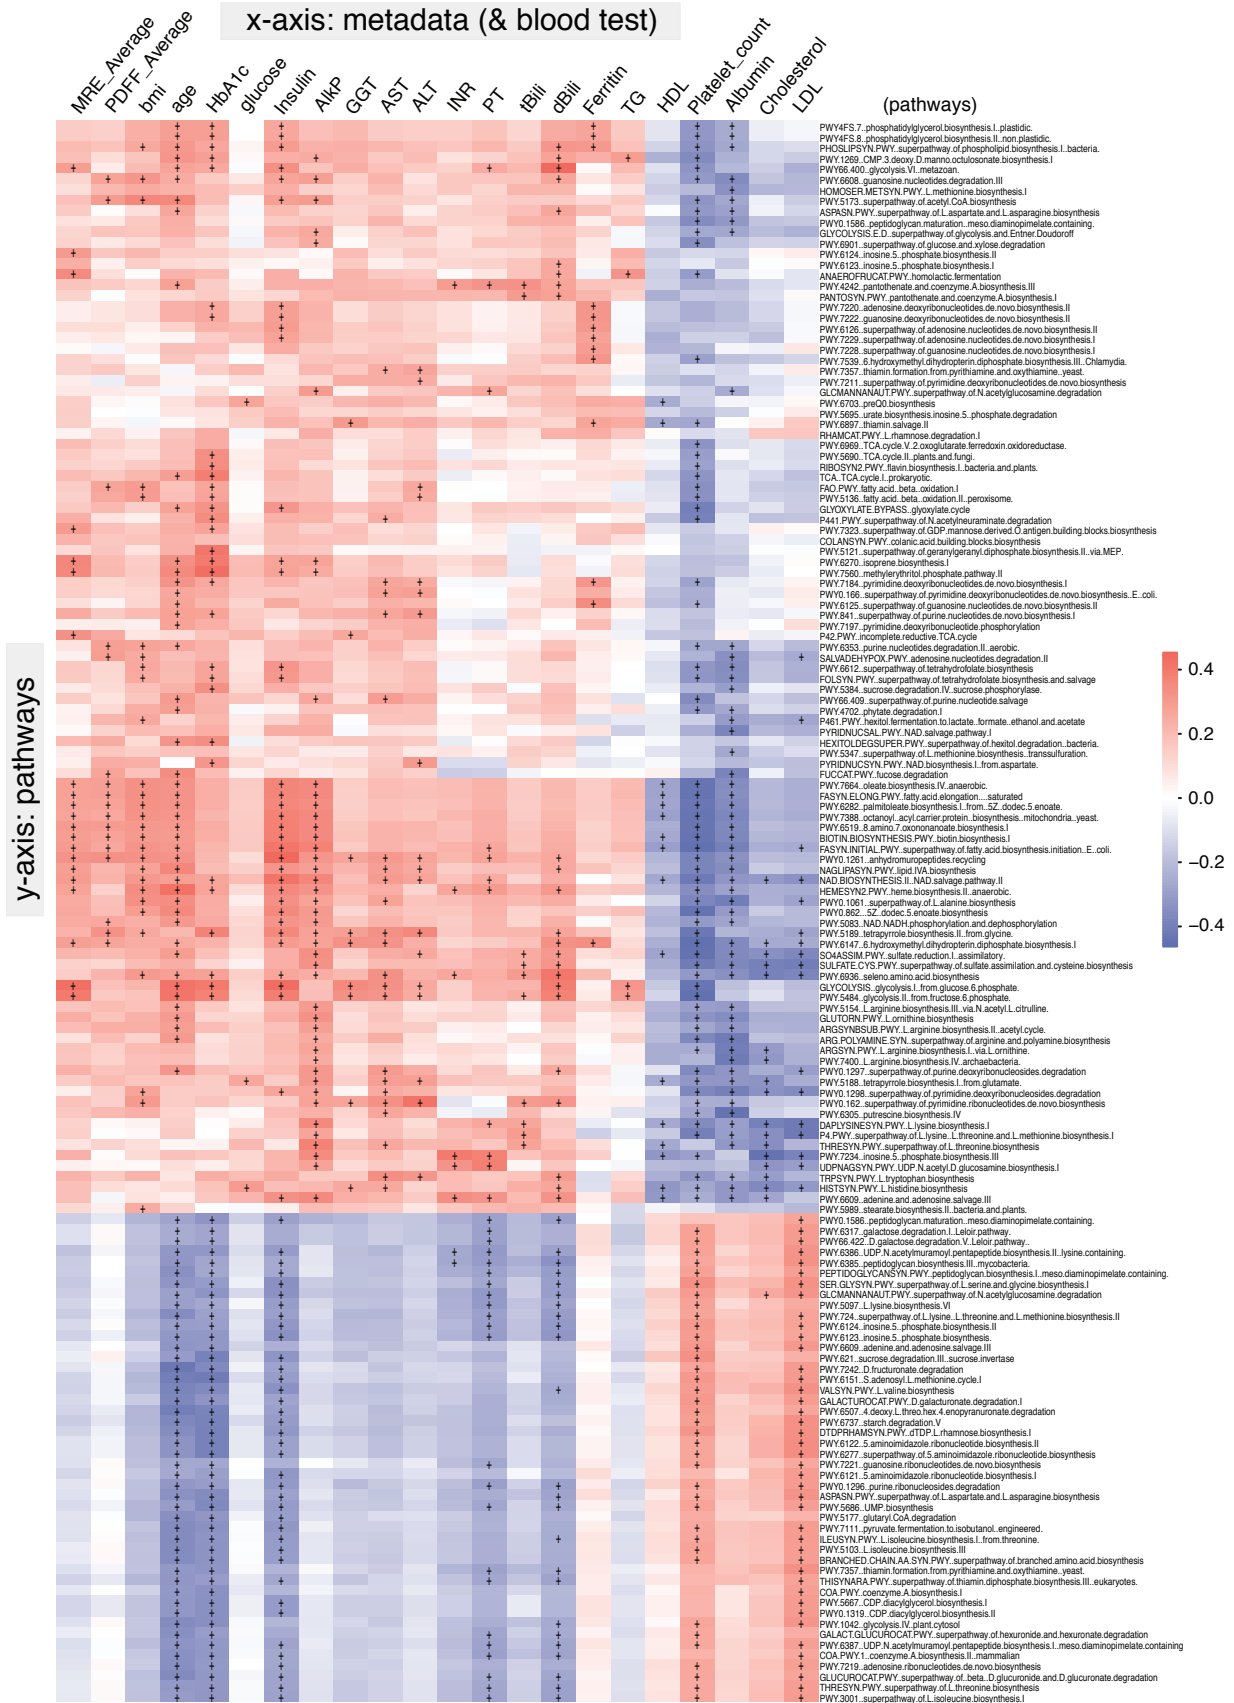

Figure S5 - related to Figure 3

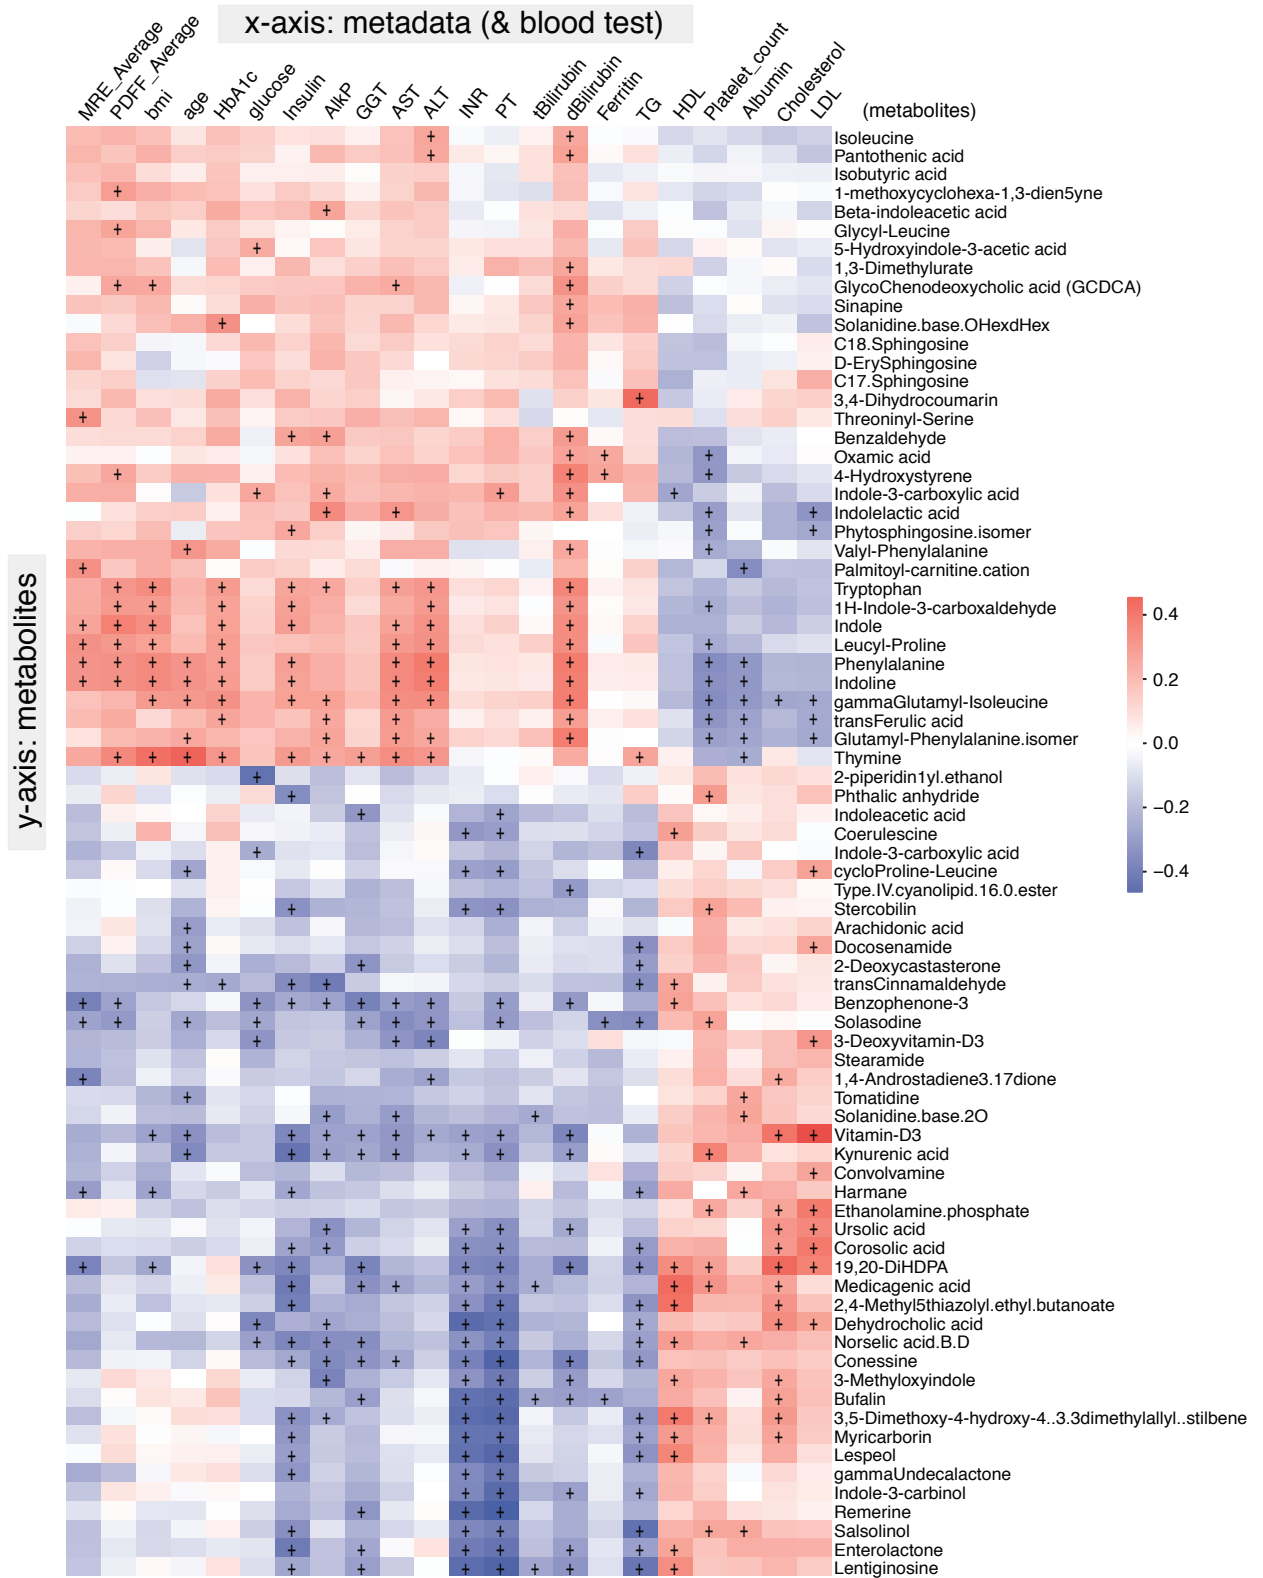

Figure S6 - related to Figure 4

**A** up\_signature (species) - related metabolites

**B** down\_signature (species) - related metabolites

● control    ◆ NAFLD-cirrhosis

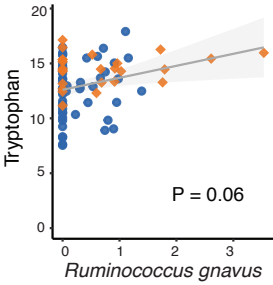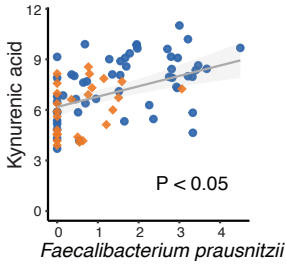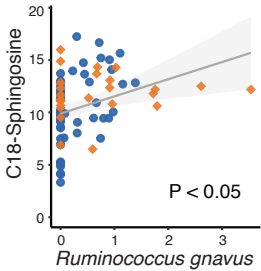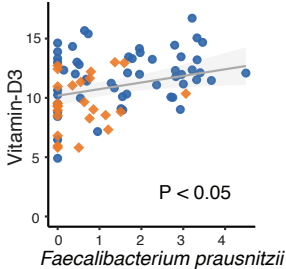

Supplement: NIHMS1660376-supplement-1.pdf [file NIHMS1660376-supplement-1.pdf]
